# Supplementary material
Source: ML conference proceedings conference paper supplement (https://proceedings.mlr.press/v70/han17a.html)
Supplement: Supplementary file 1 [file han17a-supp.pdf]

---

## Supplementary Material: Faster Greedy MAP Inference for Determinantal Point Processes

---

### A. Proof of Theorem 1

For given  $X \subseteq \mathcal{Y}$ , we denote that the true marginal gain  $\Lambda_i$  and the approximated gain  $\Delta_i$  (used in Algorithm 1) as

$$\begin{aligned}\Lambda_i &:= \log \det L_{X \cup \{i\}} - \log \det L_X \\ \Delta_i &:= \left\langle \left( \bar{L}_X^{(j)} \right)^{-1}, L_{X \cup \{i\}} - \bar{L}_X^{(j)} \right\rangle \\ &\quad + \left( \log \det \bar{L}_X^{(j)} - \log \det L_X \right)\end{aligned}$$

where an item  $i \in \mathcal{Y} \setminus X$  is in the partition  $j$ . We also use  $i_{\text{OPT}} = \operatorname{argmax}_i \Lambda_i$  and  $i_{\text{max}} = \operatorname{argmax}_i \Delta_i$ . Then, we have

$$\Lambda_{i_{\text{max}}} \geq \Delta_{i_{\text{max}}} - \varepsilon \geq \Delta_{i_{\text{OPT}}} - \varepsilon \geq \Lambda_{i_{\text{OPT}}} - 2\varepsilon$$

where the first and third inequalities are from the definition of  $\varepsilon$ , i.e.,  $|\Lambda_i - \Delta_i| \leq \varepsilon$ , and the second inequality holds by the optimality of  $i_{\text{max}}$ . In addition, when the smallest eigenvalue of  $L$  is greater than 1,  $\log \det L_X$  is monotone and non-negative (Sharma et al., 2015). To complete the proof, we introduce following approximation guarantee of the greedy algorithm with a ‘noise’ during the selection (Streeter & Golovin, 2009).

**Theorem. (Noisy greedy algorithm)** *Suppose a submodular function  $f$  defined on ground set  $\mathcal{Y}$  is monotone and non-negative. Let  $X_0 = \emptyset$  and  $X_k = X_{k-1} \cup \{i_{\text{max}}\}$  such that*

$$\begin{aligned}f(X_{k-1} \cup \{i_{\text{max}}\}) - f(X_{k-1}) \\ \geq \max_{i \in \mathcal{Y} \setminus X_{k-1}} (f(X_{k-1} \cup \{i\}) - f(X_{k-1})) - \varepsilon_k\end{aligned}$$

for some  $\varepsilon_k \geq 0$ . Then,

$$f(X_k) \geq (1 - 1/e) \max_{X \subseteq \mathcal{Y}, |X| \leq k} f(X) - \sum_{i=1}^k \varepsilon_i$$

Theorem 1 is straightforward by substituting  $2\varepsilon$  into  $\varepsilon_k$ . This completes the proof of Theorem 1.

### B. Proof of Theorem 2

As we explained in Section 2.3, Chebyshev expansion of  $\log x$  in  $[\delta, 1 - \delta]$  with degree  $n$  is defined as  $p_n(x)$ . This

can be written as

$$p_n(x) = \sum_{k=0}^n c_k T_k \left( \frac{2}{1-2\delta}x - \frac{1}{1-2\delta} \right) \quad (6)$$

where the coefficient  $c_k$  and the  $k$ -th Chebyshev polynomial  $T_k(x)$  are defined as

$$c_k = \begin{cases} \frac{1}{n+1} \sum_{j=0}^n f \left( \frac{1-2\delta}{2}x_j + \frac{1}{2} \right) T_0(x_j) & \text{if } k=0 \\ \frac{2}{n+1} \sum_{j=0}^n f \left( \frac{1-2\delta}{2}x_j + \frac{1}{2} \right) T_k(x_j) & \text{otherwise} \end{cases} \quad (7)$$

$$T_{k+1}(x) = 2xT_k(x) - T_{k-1}(x) \quad \text{for } k \geq 1 \quad (8)$$

where  $x_j = \cos \left( \frac{\pi(j+1/2)}{n+1} \right)$  for  $j = 0, 1, \dots, n$  and  $T_0(x) = 1, T_1(x) = x$  (Mason & Handscomb, 2002). For simplicity, we now use  $H := p_n(A) - p_n(B)$  and denote  $\tilde{A} = \frac{2}{1-2\delta}A - \frac{1}{1-2\delta}\mathbf{I}$  where  $\mathbf{I}$  is identity matrix with same dimension of  $A$  and same for  $\tilde{B}$ .

We estimate the log-determinant difference while random vectors are shared, i.e.,

$$\log \det A - \log \det B \approx \frac{1}{m} \sum_{i=1}^m \mathbf{v}^{(i)\top} H \mathbf{v}^{(i)}.$$

To show that the variance of  $\mathbf{v}^{(i)\top} H \mathbf{v}^{(i)}$  is small as  $\|A - B\|_F$ , we provide that

$$\begin{aligned}\mathbf{Var} \left[ \frac{1}{m} \sum_{i=1}^m \mathbf{v}^{(i)\top} H \mathbf{v}^{(i)} \right] &= \frac{1}{m} \mathbf{Var} [\mathbf{v}^\top H \mathbf{v}] \\ &\leq \frac{2}{m} \|H\|_F^2 = \frac{2}{m} \|p_n(A) - p_n(B)\|_F^2 \\ &\leq \frac{2}{m} \left( \sum_{k=0}^n |c_k| \left\| T_k(\tilde{A}) - T_k(\tilde{B}) \right\|_F \right)^2\end{aligned}$$

where the first inequality holds from (Avron & Toledo, 2011) and the second is from combining (6) with the triangle inequality. To complete the proof, we use following two lemmas.

**Lemma 3.** Let  $T_k(\cdot)$  be Chebyshev polynomial with  $k$ -degree and symmetric matrices  $B, E$  satisfied with  $\|B\|_2 \leq 1$ ,  $\|B + E\|_2 \leq 1$ . Then, for  $k \geq 0$ ,

$$\|T_k(B + E) - T_k(B)\|_F \leq k^2 \|E\|_F.$$

**Lemma 4.** Let  $c_k$  be the  $k$ -th coefficient of Chebyshev expansion for  $f(x)$ . Suppose  $f$  is analytic with  $|f(z)| \leq M$  in the region bounded by the ellipse with foci  $\pm 1$  and the length of major and minor semiaxis summing to  $\rho > 1$ . Then,

$$\sum_{k=0}^n k^2 |c_k| \leq \frac{2M\rho(\rho+1)}{(\rho-1)^3}.$$

In order to apply Lemma 4, we should consider  $f(x) = \log\left(\frac{1-2\delta}{2}x + \frac{1}{2}\right)$ . Then it can be easily obtained  $M = 5 \log(2/\delta)$  and  $\rho = 1 + \frac{2}{\sqrt{2/\delta-1}}$  as provided in (Han et al., 2015).

Using Lemma 3 and 4, we can write

$$\begin{aligned} & \text{Var} \left[ \frac{1}{m} \sum_{i=1}^m \mathbf{v}^{(i)\top} H \mathbf{v}^{(i)} \right] \\ & \leq \frac{2}{m} \left( \sum_{k=0}^n |c_k| \|T_k(\tilde{A}) - T_k(\tilde{B})\|_F \right)^2 \\ & \leq \frac{2}{m} \left( \sum_{k=0}^n |c_k| k^2 \|\tilde{A} - \tilde{B}\|_F \right)^2 \\ & \leq \frac{2}{m} \left( \frac{2M\rho(\rho+1)}{(\rho-1)^3} \right)^2 \left( \frac{2}{1-2\delta} \|A - B\|_F \right)^2 \\ & = \frac{32M^2\rho^2(\rho+1)^2}{m(\rho-1)^6(1-2\delta)^2} \|A - B\|_F^2 \end{aligned}$$

where the second inequality holds from Lemma 3 and the third is from Lemma 4. This completes the proof of Theorem 2.

### B.1. Proof of Lemma 3

Denote  $R_k := T_k(B + E) - T_k(B)$ . From the recurrence of Chebyshev polynomial (8),  $R_k$  has following

$$R_{k+1} = 2(B + E)R_k - R_{k-1} + 2E T_k(B) \quad (9)$$

for  $k \geq 1$  where  $R_1 = E$ ,  $R_0 = \mathbf{0}$  where  $\mathbf{0}$  is defined as zero matrix with the same dimension of  $B$ . Solving this, we obtain that

$$R_{k+1} = g_{k+1}(B + E)E + \sum_{i=0}^k h_i(B + E)E T_{k+1-i}(B) \quad (10)$$

for  $k \geq 1$  where both  $g_k(\cdot)$  and  $h_k(\cdot)$  are polynomials with degree  $k$  and they have following recurrences

$$\begin{aligned} g_{k+1}(x) &= 2xg_k(x) - g_{k-1}(x), g_1(x) = 1, g_0(x) = 0, \\ h_{k+1}(x) &= 2xh_k(x) - h_{k-1}(x), h_1(x) = 2, h_0(x) = 0. \end{aligned}$$

In addition, we can easily verify that

$$2 \max_{x \in [-1, 1]} |g_k(x)| = \max_{x \in [-1, 1]} |h_k(x)| = 2k.$$

Putting all together, we conclude that

$$\begin{aligned} \|R_{k+1}\|_F & \leq \|g_{k+1}(B + E)E\|_F \\ & \quad + \left\| \sum_{i=0}^k h_i(B + E)E T_{k+1-i}(B) \right\|_F \\ & \leq \|g_{k+1}(B + E)\|_2 \|E\|_F \\ & \quad + \sum_{i=0}^k \|h_i(B + E)\|_2 \|E\|_F \|T_{k+1-i}(B)\|_2 \\ & \leq \left( \|g_{k+1}(B + E)\|_2 + \sum_{i=0}^k \|h_i(B + E)\|_2 \right) \|E\|_F \\ & \leq \left( k + 1 + \sum_{i=0}^k 2i \right) \|E\|_F \\ & = (k + 1)^2 \|E\|_F \end{aligned}$$

where the second inequality holds from  $\|YX\|_F = \|XY\|_F \leq \|X\|_2 \|Y\|_F$  for matrix  $X, Y$  and the third inequality uses that  $|T_k(x)| \leq 1$  for all  $k \geq 0$ . This completes the proof of Lemma 3.

### B.2. Proof of Lemma 4

For general analytic function  $f$ , Chebyshev series of  $f$  is defined as

$$f(x) = \frac{a_0}{2} + \sum_{k=1}^{\infty} a_k T_k(x), \quad a_k = \frac{2}{\pi} \int_{-1}^1 \frac{f(x) T_k(x)}{\sqrt{1-x^2}} dx.$$

and from (Mason & Handscomb, 2002) it is known that

$$c_k - a_k = \sum_{j=1}^{\infty} (-1)^j (a_{2j(n+1)-k} + a_{2j(n+1)+k})$$

and  $|a_k| \leq \frac{2M}{\rho^k}$  for  $0 \leq k \leq n$ . We remind that  $c_k$  is defined in (7). Using this facts, we get

$$\begin{aligned} k^2 |c_k| &\leq k^2 \left( |a_k| + \sum_{j=1}^{\infty} |a_{2j(n+1)-k}| + |a_{2j(n+1)+k}| \right) \\ &\leq k^2 |a_k| + \sum_{j=1}^{\infty} k^2 |a_{2j(n+1)-k}| + k^2 |a_{2j(n+1)+k}| \\ &\leq k^2 |a_k| + \sum_{j=1}^{\infty} (2j(n+1) - k)^2 |a_{2j(n+1)-k}| \\ &\quad + (2j(n+1) + k)^2 |a_{2j(n+1)+k}| \end{aligned}$$

Therefore, we have

$$\begin{aligned} \sum_{k=0}^n k^2 |c_k| &\leq \sum_{k=0}^n k^2 |a_k| + \sum_{k=n+1}^{\infty} k^2 |a_k| \\ &\leq \sum_{k=0}^{\infty} k^2 |a_k| \leq \sum_{k=0}^{\infty} k^2 \frac{2M}{\rho^k} = \frac{2M\rho(\rho+1)}{(\rho-1)^3} \end{aligned}$$

This completes the proof of Lemma 4.

## References

- Avron, Haim and Toledo, Sivan. Randomized algorithms for estimating the trace of an implicit symmetric positive semi-definite matrix. *Journal of the ACM (JACM)*, 58(2): 8, 2011.
- Bird, Steven. Nltk: the natural language toolkit. In *Proceedings of the COLING/ACL on Interactive presentation sessions*, pp. 69–72. Association for Computational Linguistics, 2006.
- Boutsidis, Christos, Drineas, Petros, Kambadur, Prabhajan, and Zouzias, Anastasios. A randomized algorithm for approximating the log determinant of a symmetric positive definite matrix. *arXiv preprint arXiv:1503.00374*, 2015.
- Buchbinder, Niv, Feldman, Moran, Seffi, Joseph, and Schwartz, Roy. A tight linear time (1/2)-approximation for unconstrained submodular maximization. *SIAM Journal on Computing*, 44(5):1384–1402, 2015.
- Daley, Daryl J and Vere-Jones, David. *An introduction to the theory of point processes: volume II: general theory and structure*. Springer Science & Business Media, 2007.
- De Avila, Sandra Eliza Fontes, Lopes, Ana Paula Brandão, da Luz, Antonio, and de Albuquerque Araújo, Arnaldo. Vsumm: A mechanism designed to produce static video summaries and a novel evaluation method. *Pattern Recognition Letters*, 32(1):56–68, 2011.
- Feige, Uriel, Mirrokni, Vahab S, and Vondrak, Jan. Maximizing non-monotone submodular functions. *SIAM Journal on Computing*, 40(4):1133–1153, 2011.
- Gillenwater, Jennifer, Kulesza, Alex, and Taskar, Ben. Near-optimal map inference for determinantal point processes. In *Advances in Neural Information Processing Systems*, pp. 2735–2743, 2012.
- Gong, Boqing, Chao, Wei-Lun, Grauman, Kristen, and Sha, Fei. Diverse sequential subset selection for supervised video summarization. In *Advances in Neural Information Processing Systems*, pp. 2069–2077, 2014.
- Greenbaum, Anne. *Iterative methods for solving linear systems*. SIAM, 1997.
- Han, Insu, Malioutov, Dmitry, and Shin, Jinwoo. Large-scale log-determinant computation through stochastic chebyshev expansions. In *ICML*, pp. 908–917, 2015.
- Hausmann, Dirk, Korte, Bernhard, and Jenkyns, TA. Worst case analysis of greedy type algorithms for independence systems. In *Combinatorial Optimization*, pp. 120–131. Springer, 1980.
- Hutchinson, Michael F. A stochastic estimator of the trace of the influence matrix for laplacian smoothing splines. *Communications in Statistics-Simulation and Computation*, 19(2):433–450, 1990.
- Johansson, Kurt. Course 1 random matrices and determinantal processes. *Les Houches*, 83:1–56, 2006.
- Jordan, Michael Irwin. *Learning in graphical models*, volume 89. Springer Science & Business Media, 1998.
- Kang, Byungkon. Fast determinantal point process sampling with application to clustering. In *Advances in Neural Information Processing Systems*, pp. 2319–2327, 2013.
- Kathuria, Tarun and Deshpande, Amit. On sampling and greedy map inference of constrained determinantal point processes. *arXiv preprint arXiv:1607.01551*, 2016.
- Krause, Andreas, Singh, Ajit, and Guestrin, Carlos. Near-optimal sensor placements in gaussian processes: Theory, efficient algorithms and empirical studies. *Journal of Machine Learning Research*, 9(Feb):235–284, 2008.
- Kulesza, Alex and Taskar, Ben. Learning determinantal point processes. In *In Proceedings of UAI*. Citeseer, 2011.
- Kulesza, Alex, Taskar, Ben, et al. Determinantal point processes for machine learning. *Foundations and Trends® in Machine Learning*, 5(2–3):123–286, 2012.

- Kumar, Ravi, Moseley, Benjamin, Vassilvitskii, Sergei, and Vattani, Andrea. Fast greedy algorithms in mapreduce and streaming. *ACM Transactions on Parallel Computing*, 2(3):14, 2015.
- Li, Chengtao, Jegelka, Stefanie, and Sra, Suvrit. Efficient sampling for k-determinantal point processes. In *Proceedings of the 19th International Conference on Artificial Intelligence and Statistics*, pp. 1328–1337, 2016a.
- Li, Chengtao, Sra, Suvrit, and Jegelka, Stefanie. Gaussian quadrature for matrix inverse forms with applications. In *Proceedings of The 33rd International Conference on Machine Learning*, pp. 1766–1775, 2016b.
- Liu, Yajing, Zhang, Zhenliang, Chong, Edwin KP, and Pezeshki, Ali. Performance bounds for the k-batch greedy strategy in optimization problems with curvature. In *American Control Conference (ACC), 2016*, pp. 7177–7182. IEEE, 2016.
- Macchi, Odile. The coincidence approach to stochastic point processes. *Advances in Applied Probability*, 7(01): 83–122, 1975.
- Mason, John C and Handscomb, David C. *Chebyshev polynomials*. CRC Press, 2002.
- Minoux, Michel. Accelerated greedy algorithms for maximizing submodular set functions. In *Optimization Techniques*, pp. 234–243. Springer, 1978.
- Mirzasoleiman, Baharan, Badanidiyuru, Ashwinkumar, Karbasi, Amin, Vondrák, Jan, and Krause, Andreas. Lazier than lazy greedy. In *Twenty-Ninth AAAI Conference on Artificial Intelligence*, 2015.
- Nemhauser, George L, Wolsey, Laurence A, and Fisher, Marshall L. An analysis of approximations for maximizing submodular set functions. *Mathematical Programming*, 14(1):265–294, 1978.
- Ouellette, Diane Valerie. Schur complements and statistics. *Linear Algebra and its Applications*, 36:187–295, 1981.
- Pan, Xinghao, Jegelka, Stefanie, Gonzalez, Joseph E, Bradley, Joseph K, and Jordan, Michael I. Parallel double greedy submodular maximization. In *Advances in Neural Information Processing Systems*, pp. 118–126, 2014.
- Peng, Wei and Wang, Hongxia. Large-scale log-determinant computation via weighted L<sub>2</sub> polynomial approximation with prior distribution of eigenvalues. In *International Conference on High Performance Computing and Applications*, pp. 120–125. Springer, 2015.
- Saad, Yousef. *Iterative methods for sparse linear systems*. SIAM, 2003.
- Sharma, Dravyansh, Kapoor, Ashish, and Deshpande, Amit. On greedy maximization of entropy. In *ICML*, pp. 1330–1338, 2015.
- Streeter, Matthew and Golovin, Daniel. An online algorithm for maximizing submodular functions. In *Advances in Neural Information Processing Systems*, pp. 1577–1584, 2009.
- Yao, Jin-ge, Fan, Feifan, Zhao, Wayne Xin, Wan, Xiaojun, Chang, Edward, and Xiao, Jianguo. Tweet timeline generation with determinantal point processes. In *Proceedings of the Thirtieth AAAI Conference on Artificial Intelligence*, pp. 3080–3086. AAAI Press, 2016.
- Zhang, Martin J and Ou, Zhijian. Block-wise map inference for determinantal point processes with application to change-point detection. In *Statistical Signal Processing Workshop (SSP), 2016 IEEE*, pp. 1–5. IEEE, 2016.
